# Supplementary material for: Extremely bulky secondary phosphinoamines as substituents for sterically hindered aminosilanes
Source: Royal Society of Chemistry journal article supplement (doi:10.1039/c5dt02504d), 2015-01-01
Supplement: c5dt02504d1.pdf [file c5dt02504d1.pdf]

# Extremely bulky secondary phosphinoamines as substituents for sterically hindered aminosilanes.

*Tobias Böttcher\* and Cameron Jones\**

School of Chemistry, Monash University, P.O. Box 23, Melbourne, Victoria, 3800, Australia

## Supporting Information

(4 pages)

### Contents

|                               |    |
|-------------------------------|----|
| Crystallographic Studies..... | S2 |
|-------------------------------|----|

## 1. Crystallographic Studies

Table S1: Summary of crystallographic data for compounds **1**, **2**, **2-K**, **3**, **4**, **5**, **6**, **7**, **8**, **9**, **10**, **11** and **12**.

|                                                                        | <b>1</b>                           | <b>2</b>                                         | <b>2-K</b>                                        | <b>3</b>                                         | <b>4</b>                                            |
|------------------------------------------------------------------------|------------------------------------|--------------------------------------------------|---------------------------------------------------|--------------------------------------------------|-----------------------------------------------------|
| empirical formula                                                      | C <sub>47</sub> H <sub>42</sub> NP | C <sub>43</sub> H <sub>52</sub> N <sub>3</sub> P | C <sub>50</sub> H <sub>59</sub> KN <sub>3</sub> P | C <sub>47</sub> H <sub>60</sub> N <sub>3</sub> P | C <sub>42.50</sub> H <sub>45</sub> N <sub>2</sub> P |
| formula weight                                                         | 651.79                             | 641.85                                           | 772.07                                            | 697.95                                           | 614.78                                              |
| crystal system                                                         | monoclinic                         | monoclinic                                       | monoclinic                                        | triclinic                                        | triclinic                                           |
| space group                                                            | P2 <sub>1</sub> /n                 | P2 <sub>1</sub>                                  | P2 <sub>1</sub> /c                                | P-1                                              | P-1                                                 |
| <i>T</i> (K)                                                           | 123(2)                             | 123(2)                                           | 100(2) K                                          | 123(2)                                           | 100(2) K                                            |
| <i>a</i> (Å)                                                           | 9.1571(6)                          | 8.5767(6)                                        | 18.506(4)                                         | 11.2534(6)                                       | 9.931(2)                                            |
| <i>b</i> (Å)                                                           | 41.566(3)                          | 18.5068(14)                                      | 12.825(3)                                         | 12.2272(5)                                       | 11.495(2)                                           |
| <i>c</i> (Å)                                                           | 9.5665(6)                          | 11.4751(10)                                      | 18.632(4)                                         | 16.8486(9)                                       | 16.176(3)                                           |
| <i>α</i> (deg)                                                         | 90                                 | 90                                               | 90                                                | 70.230(4)                                        | 92.84(3)                                            |
| <i>β</i> (deg)                                                         | 102.692(6)                         | 92.692(7)                                        | 97.72(3)                                          | 73.735(4)                                        | 107.41(3)                                           |
| <i>γ</i> (deg)                                                         | 90                                 | 90                                               | 90                                                | 76.194(4)                                        | 90.52(3)                                            |
| <i>V</i> (Å <sup>3</sup> )                                             | 3552.3(4)                          | 1819.4(2)                                        | 4382.0(15)                                        | 2067.62(18)                                      | 1759.2(6)                                           |
| <i>Z</i>                                                               | 4                                  | 2                                                | 4                                                 | 2                                                | 2                                                   |
| <i>ρ</i> (calcd) (g cm <sup>-3</sup> )                                 | 1.219                              | 1.172                                            | 1.170                                             | 1.121                                            | 1.161                                               |
| <i>μ</i> mm <sup>-1</sup>                                              | 0.112                              | 0.109                                            | 0.194                                             | 0.101                                            | 0.110                                               |
| <i>F</i> (000)                                                         | 1384                               | 692                                              | 1656                                              | 756                                              | 658                                                 |
| reflections collected                                                  | 17730                              | 8742                                             | 50871                                             | 18998                                            | 12551                                               |
| independent reflections                                                | 6603                               | 5873                                             | 9538                                              | 7695                                             | 6033                                                |
| <i>R</i> <sub>int</sub>                                                | 0.0406                             | 0.0316                                           | 0.0735                                            | 0.0314                                           | 0.0266                                              |
| <i>R</i> <sub>1</sub> indices [ <i>I</i> >2σ( <i>I</i> )] <sup>a</sup> | 0.0482                             | 0.0414                                           | 0.0776                                            | 0.0424                                           | 0.0625                                              |
| <i>wR</i> <sub>2</sub> indices (all data) <sup>b</sup>                 | 0.0930                             | 0.0949                                           | 0.2331                                            | 0.1030                                           | 0.1558                                              |
| largest peak and hole (eÅ <sup>-3</sup> )                              | 0.383 and -0.489                   | 0.416 and -0.307                                 | 0.964 and -0.746                                  | 0.506 and -0.501                                 | 1.711 and -0.882                                    |
| Goodness-of-fit on <i>F</i> <sup>2</sup> <sup>c</sup>                  | 1.034                              | 1.048                                            | 1.020                                             | 1.026                                            | 1.041                                               |
| CCDC No.                                                               | 1401422                            | 1401423                                          | 1401424                                           | 1401425                                          | 1401426                                             |

|                   | <b>5</b>                                             | <b>6</b>                                             | <b>7</b>                                             | <b>8</b>                                             | <b>9</b>                                                          |
|-------------------|------------------------------------------------------|------------------------------------------------------|------------------------------------------------------|------------------------------------------------------|-------------------------------------------------------------------|
| empirical formula | C <sub>47</sub> H <sub>41</sub> Cl <sub>3</sub> NPSi | C <sub>47</sub> H <sub>42</sub> Cl <sub>2</sub> NPSi | C <sub>61</sub> H <sub>55</sub> Cl <sub>5</sub> NPSi | C <sub>47</sub> H <sub>43</sub> NPSi <sub>0.50</sub> | C <sub>47</sub> H <sub>41</sub> Cl <sub>3</sub> NPSi <sub>2</sub> |
| formula weight    | 785.22                                               | 750.78                                               | 1038.37                                              | 666.34                                               | 884.21                                                            |
| crystal system    | orthorhombic                                         | orthorhombic                                         | triclinic                                            | monoclinic                                           | monoclinic                                                        |
| space group       | P2 <sub>1</sub> 2 <sub>1</sub> 2 <sub>1</sub>        | P2 <sub>1</sub> 2 <sub>1</sub> 2 <sub>1</sub>        | P-1                                                  | P2 <sub>1</sub> /c                                   | P2 <sub>1</sub> /c                                                |
| <i>T</i> (K)      | 123(2)                                               | 123(2)                                               | 100(2)                                               | 100(2)                                               | 123(2)                                                            |
| <i>a</i> (Å)      | 10.0456(15)                                          | 9.9729(4)                                            | 12.6871(18)                                          | 21.116(4)                                            | 10.1240(8)                                                        |
| <i>b</i> (Å)      | 13.252(2)                                            | 13.3211(6)                                           | 13.720(3)                                            | 9.7250(19)                                           | 20.1891(15)                                                       |
| <i>c</i> (Å)      | 29.583(7)                                            | 29.4129(12)                                          | 16.385(2)                                            | 18.206(4)                                            | 21.6338(19)                                                       |
| <i>α</i> (deg)    | 90                                                   | 90                                                   | 72.602(15)                                           | 90                                                   | 90                                                                |
| <i>β</i> (deg)    | 90                                                   | 90                                                   | 83.732(11)                                           | 97.81(3)                                             | 92.815(7)                                                         |

|                                            |                  |                  |                  |                  |                  |
|--------------------------------------------|------------------|------------------|------------------|------------------|------------------|
| $\gamma$ (deg)                             | 90               | 90               | 80.682(15)       | 90               | 90               |
| V (Å)                                      | 3938.4(12)       | 3907.5(3)        | 2680.1(8)        | 3704.0(13)       | 4416.5(6)        |
| Z                                          | 4                | 4                | 2                | 4                | 4                |
| $\rho$ (calcd) (g cm <sup>-3</sup> )       | 1.324            | 1.276            | 1.287            | 1.195            | 1.330            |
| $\mu$ mm <sup>-1</sup>                     | 0.339            | 0.273            | 0.363            | 0.124            | 0.453            |
| F(000)                                     | 1640             | 1576             | 1084             | 1414             | 1832             |
| reflections collected                      | 13854            | 14488            | 18171            | 32355            | 22407            |
| independent reflections                    | 7047             | 6782             | 9836             | 8787             | 8219             |
| $R_{\text{int}}$                           | 0.1607           | 0.0403           | 0.1050           | 0.0568           | 0.0557           |
| R1 indices [I>2 $\sigma$ (I)] <sup>a</sup> | 0.1039           | 0.0520           | 0.0798           | 0.0594           | 0.0577           |
| wR2 indices (all data) <sup>b</sup>        | 0.2826           | 0.1279           | 0.2279           | 0.1449           | 0.1466           |
| largest peak and hole (eÅ <sup>-3</sup> )  | 0.897 and -0.776 | 1.316 and -0.985 | 0.654 and -0.667 | 0.375 and -0.353 | 1.049 and -0.441 |
| Goodness-of-fit on $F^2$ <sup>c</sup>      | 1.029            | 1.041            | 0.940            | 1.150            | 1.021            |
| CCDC No.                                   | 1401427          | 1401428          | 1401429          | 1401430          | 1401431          |

|                                            | <b>10</b>                                         | <b>11</b>                                                         | <b>12</b>                                                                                      |
|--------------------------------------------|---------------------------------------------------|-------------------------------------------------------------------|------------------------------------------------------------------------------------------------|
| empirical formula                          | C <sub>47</sub> H <sub>46</sub> NPSi <sub>2</sub> | C <sub>54</sub> H <sub>49</sub> Cl <sub>9</sub> NPSi <sub>5</sub> | C <sub>101</sub> H <sub>90</sub> Cl <sub>8</sub> N <sub>2</sub> P <sub>2</sub> Si <sub>5</sub> |
| formula weight                             | 712.00                                            | 1202.41                                                           | 1817.74                                                                                        |
| crystal system                             | monoclinic                                        | triclinic                                                         | monoclinic                                                                                     |
| space group                                | P2 <sub>1</sub> /c                                | P-1                                                               | P2 <sub>1</sub> /n                                                                             |
| T (K)                                      | 100(2)                                            | 100(2)                                                            | 100(2)                                                                                         |
| a (Å)                                      | 13.977(3)                                         | 10.470(2)                                                         | 17.441(4)                                                                                      |
| b (Å)                                      | 9.827(2)                                          | 16.168(3)                                                         | 23.780(5)                                                                                      |
| c (Å)                                      | 29.607(6)                                         | 18.415(4)                                                         | 23.866(5)                                                                                      |
| $\alpha$ (deg)                             | 90                                                | 108.85(3)                                                         | 90                                                                                             |
| $\beta$ (deg)                              | 102.56(3)                                         | 90.82(3)                                                          | 93.20(3)                                                                                       |
| $\gamma$ (deg)                             | 90                                                | 99.88(3)                                                          | 90                                                                                             |
| V (Å)                                      | 3969.3(14)                                        | 2898.3(10)                                                        | 9883(3)                                                                                        |
| Z                                          | 4                                                 | 2                                                                 | 4                                                                                              |
| $\rho$ (calcd) (g cm <sup>-3</sup> )       | 1.191                                             | 1.378                                                             | 1.222                                                                                          |
| $\mu$ mm <sup>-1</sup>                     | 0.163                                             | 0.603                                                             | 0.366                                                                                          |
| F(000)                                     | 1512                                              | 1236                                                              | 3784                                                                                           |
| reflections collected                      | 29006                                             | 18549                                                             | 39379                                                                                          |
| independent reflections                    | 7305                                              | 9364                                                              | 10481                                                                                          |
| $R_{\text{int}}$                           | 0.0775                                            | 0.0458                                                            | 0.1434                                                                                         |
| R1 indices [I>2 $\sigma$ (I)] <sup>a</sup> | 0.0488                                            | 0.0478                                                            | 0.1007                                                                                         |
| wR2 indices (all data) <sup>b</sup>        | 0.1310                                            | 0.1311                                                            | 0.3063                                                                                         |
| largest peak and hole (eÅ <sup>-3</sup> )  | 0.338 and -0.735                                  | 0.809 and -0.436                                                  | 0.759 and -0.324                                                                               |
| Goodness-of-fit on $F^2$ <sup>c</sup>      | 1.047                                             | 1.029                                                             | 1.051                                                                                          |

|          |         |         |         |
|----------|---------|---------|---------|
| CCDC No. | 1401432 | 1401433 | 1401434 |
|----------|---------|---------|---------|

<sup>a</sup> $RI = \Sigma||F_0| - |F_c||/\Sigma |F_0|$ . <sup>b</sup> $wR2 = [\Sigma\{w(F_0^2 - F_e^2)^2\}/\Sigma w(F_0^2)^2]^{1/2}$ ,  $w = 1/[\sigma^2 F_0^2 + (aP)^2 + bP]$  (a and b are constants suggested by the refinement program;  $P = [\max(F_0^2, 0) + 2F_e^2]/3$ ). <sup>c</sup> $GOF = [\Sigma w(F_0^2 - F_e^2)^2/(N_{obs} - N_{params})]^{1/2}$ .

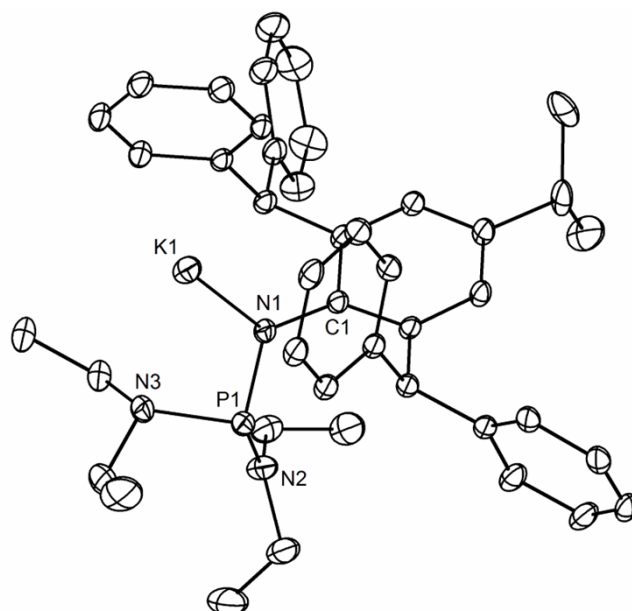

Fig. S1. Molecular structure **2-K**. (25% displacement ellipsoids are shown; C–H hydrogen atoms omitted). See main text for structural parameters.
